# Supplementary material for: Probing Mechanisms of Binding and Allostery in the SARS-CoV-2 Spike Omicron Variant Complexes with the Host Receptor: Revealing Functional Roles of the Binding Hotspots in Mediating Epistatic Effects and Communication with Allosteric Pockets
Source: MDPI journal article supplement (doi:10.3390/ijms231911542), 2022-09-29
Supplement: s1 [file s1]

# Supplementary Information

## **Probing Mechanisms of Binding and Allostery in the SARS-CoV-2 Spike Omicron Variant Complexes with the Host Receptor: Revealing Functional Roles of the Binding Hotspots in Mediating Epistatic Effects and Communication with Allosteric Pockets**

Gennady Verkhivker,<sup>1,2\*</sup> Steve Agajanian<sup>1</sup>, Ryan Kassab<sup>1</sup>, Keerthi Krishnan<sup>1</sup>

<sup>1</sup> Keck Center for Science and Engineering, Graduate Program in Computational and Data Sciences, Schmid College of Science and Technology, Chapman University, Orange, CA 92866, United States of America

<sup>2</sup> Department of Biomedical and Pharmaceutical Sciences, Chapman University School of Pharmacy, Irvine, CA 92618, United States of America

\* Correspondence: verkhivk@chapman.edu; Tel.: +1-714-516-4586 (G.V)

Received: date; Accepted: date; Published: date

**Table S1.** Statistical analysis of the intermolecular contact residues in Omicron RBD-hACE2 complexes.\*

| <b>hACE2</b> | <b>BA.1 RBD</b>                           | <b>BA.1.1 RBD</b>                                 | <b>BA.2 RBD</b>                          | <b>BA.3 RBD</b>                          |
|--------------|-------------------------------------------|---------------------------------------------------|------------------------------------------|------------------------------------------|
| S19          | A475,<br>G476,N477                        | A475,<br>G476,N477                                | A475,<br>G476,N477                       | A475,<br>G476,N477                       |
| T20          |                                           | N477                                              | N477                                     | A475,N477                                |
| Q24          | A475,<br>G476,N477<br>F486, N487,<br>Y489 | A475,<br>G476,N477<br>F486, N487,<br>Y489         | A475,<br>G476,N477<br>F486,N487,<br>Y489 | A475,<br>G476,N477<br>F486,N487,<br>Y489 |
| T27          | F456, Y473,<br>A475,Y489                  | F456, Y473,<br>A475,Y489                          | F456, Y473,<br>A475,Y489                 | F456, Y473,<br>A475,Y489                 |
| F28          | N487,Y489                                 | N487,Y489                                         | N487,Y489                                | Y489                                     |
| F30          | L455, F456                                | N417, L455,<br>F456                               | N417, L455,<br>F456                      | L455, F456                               |
| K31          | L455, F456,<br>Y489,R493                  | L455, F456,<br>Y489,F490,<br>L492, R493           | L455, F456,<br>G485,Y489,<br>R493        | L455, F456,<br>Y489,R493                 |
| H34          | Y453, L455,<br>R493, S494,<br>Y495        | N417,<br>Y453, L455,<br>R493                      | R403, N417,<br>Y453, L455,<br>R493       | N417, Y453,<br>L455, R493                |
| E35          | R493                                      | R493                                              | R493                                     | R493                                     |
| E37          | H505                                      | H505                                              | H505                                     | H505                                     |
| D38          | Y449, S496,<br>R498, Y501                 | Y449, R493,<br>S494, Y495,<br>S496, R498,<br>Y501 | Y449, Y495,<br>G496, R498, Y501          | Y449, Y495,<br>R498, Y501                |
| Y41          | R498, T500,<br>Y501                       | R498, T500,<br>Y501                               | R498, T500,<br>Y501                      | R498, T500,<br>Y501                      |
| Q42          | S446, Y449,<br>R498                       | Y449, R498                                        | Y449, R498                               | Y449, R498                               |
| L45          | R498,T500                                 | V445,<br>R498,T500                                | V445,<br>R498,T500                       | V445,<br>R498,T500                       |
| L79          | F486                                      | F486                                              | G485,F486                                | F486                                     |
| M82          | F486                                      | F486                                              | F486                                     | F486                                     |
| Y83          | F486, N487,<br>Y489                       | F486, N487,<br>Y489                               | F486, N487,<br>Y489                      | F486, N487,<br>Y489                      |
| Q325         | V593                                      |                                                   | Q506                                     | V503, Q506                               |

|      |                                                   |                                       |                                                  |                                                  |
|------|---------------------------------------------------|---------------------------------------|--------------------------------------------------|--------------------------------------------------|
| G326 |                                                   |                                       |                                                  | T500                                             |
| N330 | T500                                              | T500                                  | P499,T500                                        | P499,T500                                        |
| G352 |                                                   |                                       | Y501,G502                                        | Y501,G502                                        |
| K353 | R403, Y495,<br>S496, T500,<br>Y501, G502,<br>H505 | Y495,S496<br>T500, Y501,<br>G502,H505 | R403, Y495,<br>T500,Y501,<br>G502, V503,<br>H505 | R403, Y495,<br>T500,Y501,<br>G502, V503,<br>H505 |
| G354 | T500,Y501,<br>G502,V503,<br>H505                  | T500, Y501,<br>G502, H505             | T500,Y501,<br>G502,V503,<br>H505                 | T500,Y501,<br>G502,V503,<br>H505                 |
| D355 | T500,<br>Y501,G502                                | T500,<br>Y501,G502                    | T500,<br>Y501,G502                               | T500,<br>Y501,G502                               |
| R357 |                                                   | T500                                  | T500                                             |                                                  |

\*Two residues are defined in contact if any of their heavy atom is within a distance of 5.0 Å

**Table S2.** The Occupancy of the Pairwise Interactions in the Omicron RBD-hACE2 Complexes

|                                  | <b>Interaction</b> | <b>BA.1-<br/>ACE2</b> | <b>BA.1.1-<br/>ACE2</b> | <b>BA.2-<br/>ACE2</b> | <b>BA.3-<br/>ACE2</b> |
|----------------------------------|--------------------|-----------------------|-------------------------|-----------------------|-----------------------|
| <b>Salt<br/>bridges</b>          | R403-E37           | 65%                   | 78%                     | 73%                   | 73%                   |
|                                  | K440-E329          | 31%                   | 56%                     | 54%                   | 54%                   |
|                                  | R493-E35           | 77%                   | 88%                     | 92%                   | 99%                   |
|                                  | R493-D38           | 26%                   | 95%                     | 89%                   | 89%                   |
|                                  | R498-D38           | 59%                   | 97%                     | 95%                   | 83%                   |
| <b>Hydrophobic Interactions</b>  | F456-T27           | 95%                   | 87%                     | 96%                   | 88%                   |
|                                  | Y473-T27           | 92%                   | 88%                     | 89%                   | 85%                   |
|                                  | A475-T27           | 88%                   | 87%                     | 93%                   | 83%                   |
|                                  | F486-F28           | 78%                   | 92%                     | 97%                   | 90%                   |
|                                  | F486-L79           | 85%                   | 93%                     | 89%                   | 82%                   |
|                                  | F486-M82           | 85%                   | 92%                     | 96%                   | 90%                   |
|                                  | F486-Y83           | 90%                   | 98%                     | 95%                   | 87%                   |
|                                  | Y489-F28           | 97%                   | 90%                     | 94%                   | 95%                   |
|                                  | Y489-L79           | 90%                   | 89%                     | 95%                   | 86%                   |
|                                  | Y489-Y83           | 96%                   | 78%                     | 82%                   | 88%                   |
| <b>Hydrogen Bonds</b>            | Y453-H34           | 36%                   | 42%                     | 32%                   | 92%                   |
|                                  | Y449-D38           | 45%                   | 54%                     | 52%                   | 58%                   |
|                                  | A475-S19           | 30%                   | 70%                     | 65%                   | 85%                   |
|                                  | N477-S19           | 28%                   | 72%                     | 77%                   | 97%                   |
|                                  | N487-Y83           | 42%                   | 76%                     | 82%                   | 92%                   |
|                                  | T500-D355          | 62%                   | 74%                     | 77%                   | 90%                   |
|                                  | T500-Y41           | 62%                   | 82%                     | 80%                   | 95%                   |
|                                  | G502-K353          | 78%                   | 82%                     | 84%                   | 78%                   |
|                                  | Y501-K353          | 66%                   | 92%                     | 90%                   | 84%                   |
| <b>Specific<br/>Interactions</b> | Y501-Y41           | 85                    | 88%                     | 92%                   | 91%                   |
|                                  | Y501-K353          | 82%                   | 88%                     | 96%                   | 92%                   |

**Table S3.** The electrostatic polar energies and desolvation energies for the RBD residues based on the equilibrium structure of the Omicron RBD BA.1-hACE2 complex.\*

| Residue Name | pKa   | Elec.polar<br>G(charged) | Elec.<br>polar<br>G(neutral) | Desolvation<br>G(charged) | Desolvation<br>G(neutral) |
|--------------|-------|--------------------------|------------------------------|---------------------------|---------------------------|
| ARG0346      | 12.19 | -0.1359                  | 0.0049                       | 0.0361                    | 0.0050                    |
| ARG0355      | 12.97 | -0.1693                  | 0.0852                       | 0.0967                    | 0.0211                    |
| LYS0356      | 11.01 | -0.1282                  | 0.0403                       | 0.0381                    | 0.0060                    |
| ARG0357      | 12.26 | -0.0860                  | 0.0602                       | 0.0467                    | 0.0081                    |
| ASP0364      | 3.80  | -0.2422                  | -0.0248                      | 0.0870                    | 0.0284                    |
| LYS0378      | 10.80 | -0.0449                  | 0.0139                       | 0.0162                    | 0.0076                    |
| LYS0386      | 10.87 | -0.0564                  | -0.0173                      | 0.0086                    | 0.0044                    |
| ASP0389      | 3.92  | 0.0681                   | 0.0532                       | 0.0841                    | 0.0318                    |
| ASP0398      | 2.74  | 0.1148                   | 0.0403                       | 0.2053                    | 0.0562                    |
| ARG0403      | 13.09 | 0.2182                   | 0.0144                       | 0.1298                    | 0.0228                    |
| ASP0405      | 2.85  | -0.2475                  | 0.0219                       | 0.0930                    | 0.0287                    |
| GLU0406      | 2.41  | -0.5120                  | -0.1416                      | 0.1728                    | 0.0814                    |
| ARG0408      | 12.74 | -0.1853                  | 0.1030                       | 0.0618                    | 0.0084                    |
| ASP0420      | 3.16  | -0.2342                  | -0.0468                      | 0.1100                    | 0.0307                    |
| LYS0424      | 11.22 | -0.2218                  | -0.0781                      | 0.0839                    | 0.0091                    |
| ASP0427      | 3.49  | -0.1535                  | 0.0115                       | 0.0506                    | 0.0206                    |
| ASP0428      | 3.59  | -0.3138                  | -0.0418                      | 0.0885                    | 0.0312                    |
| LYS0440      | 10.79 | 0.0707                   | 0.0037                       | 0.0147                    | 0.0045                    |
| ASP0442      | 2.31  | -0.1857                  | 0.0955                       | 0.1677                    | 0.0415                    |
| LYS0444      | 10.48 | 0.0411                   | -0.0111                      | 0.0447                    | 0.0045                    |
| ARG0454      | 12.94 | -0.8003                  | -0.1488                      | 0.2183                    | 0.0326                    |
| ARG0457      | 13.06 | -0.2267                  | -0.0202                      | 0.1139                    | 0.0284                    |
| LYS0458      | 11.08 | -0.1643                  | 0.0370                       | 0.0328                    | 0.0053                    |
| LYS0462      | 10.93 | -0.0337                  | 0.0037                       | -0.0013                   | 0.0051                    |
| GLU0465      | 3.06  | -0.1407                  | 0.0048                       | 0.0779                    | 0.0053                    |
| ARG0466      | 12.46 | -0.5530                  | -0.2125                      | 0.0913                    | 0.0274                    |
| ASP0467      | 2.77  | -0.3815                  | -0.0474                      | 0.1338                    | 0.0413                    |
| GLU0471      | 3.55  | 0.0021                   | 0.0162                       | 0.0232                    | 0.0014                    |
| LYS0478      | 10.82 | -0.0092                  | 0.0056                       | 0.0107                    | 0.0046                    |
| ARG0493      | 12.97 | -0.2343                  | 0.0692                       | 0.1424                    | 0.0254                    |
| ARG0498      | 13.24 | -0.3585                  | 0.0178                       | 0.1809                    | 0.0226                    |
| HIS0505      | 5.98  | 0.1497                   | -0.0646                      | 0.0853                    | 0.0138                    |
| ARG0509      | 12.97 | -0.3253                  | 0.1119                       | 0.1667                    | 0.0291                    |
| GLU0516      | 3.79  | 0.0190                   | -0.0273                      | 0.0752                    | 0.0050                    |
| HIS0519      | 6.52  | -0.0064                  | 0.0024                       | 0.0128                    | 0.0039                    |

\* pKa value for each ionizable residue with associated energy terms (the unit here is kcal/mol). The electrostatic polar energy for individual residue in its protonated (+/-) state and neutral state, and the desolvation energy for individual residue in its protonated (+/-) state and neutral state.

**Table S4.** The electrostatic polar energies and desolvation energies for the RBD residues based on the equilibrium structure of the Omicron RBD BA.1.1-hACE2 complex.\*

| <b>Residue Name</b> | <b>pKa</b> | <b>Elec. polar G(charged)</b> | <b>Elec. polar G(neutral)</b> | <b>Desolvation G(charged)</b> | <b>Desolvation G(neutral)</b> |
|---------------------|------------|-------------------------------|-------------------------------|-------------------------------|-------------------------------|
| ASP0339             | 3.81       | -0.0908                       | 0.0711                        | 0.0541                        | 0.0211                        |
| GLU0340             | 3.46       | -0.0170                       | 0.0221                        | 0.0496                        | 0.0037                        |
| LYS0346             | 10.77      | -0.0487                       | -0.0048                       | 0.0129                        | 0.0039                        |
| ARG0355             | 13.03      | -0.2704                       | 0.0674                        | 0.1592                        | 0.0396                        |
| LYS0356             | 11.07      | -0.1082                       | 0.0108                        | 0.0445                        | 0.0048                        |
| ARG0357             | 12.15      | -0.0903                       | -0.0354                       | 0.0661                        | 0.0146                        |
| ASP0364             | 3.50       | -0.5453                       | -0.2062                       | 0.1596                        | 0.3294                        |
| LYS0378             | 10.79      | -0.0481                       | 0.0023                        | 0.0283                        | 0.0063                        |
| LYS0386             | 10.76      | 0.2961                        | 0.0784                        | 0.0457                        | 0.0072                        |
| ASP0389             | 3.97       | 0.2925                        | 0.0105                        | 0.0896                        | 0.0277                        |
| ASP0398             | 2.69       | 0.2209                        | 0.0373                        | 0.2015                        | 0.0707                        |
| ARG0403             | 13.00      | 0.2234                        | 0.0133                        | 0.1117                        | 0.0170                        |
| ASP0405             | 2.79       | -0.2302                       | 0.0127                        | 0.0779                        | 0.0254                        |
| GLU0406             | 2.55       | -0.2820                       | 0.0030                        | 0.1709                        | 0.0287                        |
| ARG0408             | 12.56      | -0.0134                       | 0.0027                        | 0.0388                        | 0.0084                        |
| ASP0420             | 3.19       | -0.2075                       | 0.0623                        | 0.1201                        | 0.0455                        |
| LYS0424             | 11.52      | -0.2984                       | 0.0286                        | 0.0807                        | 0.0075                        |
| ASP0427             | 3.52       | -0.1363                       | 0.0068                        | 0.0576                        | 0.0222                        |
| ASP0428             | 3.79       | -0.2309                       | -0.0258                       | 0.0887                        | 0.0318                        |
| LYS0440             | 10.79      | 0.0684                        | 0.0046                        | 0.0047                        | 0.0050                        |
| ASP0442             | 2.50       | -0.2114                       | 0.1357                        | 0.1722                        | 0.0451                        |
| LYS0444             | 10.79      | -0.1484                       | -0.0160                       | 0.0476                        | 0.0039                        |
| ARG0454             | 12.89      | -0.5339                       | 0.0827                        | 0.1961                        | 0.0331                        |
| ARG0457             | 13.07      | -0.3141                       | -0.0174                       | 0.1126                        | 0.0206                        |
| LYS0458             | 11.04      | -0.0493                       | 0.0117                        | 0.0201                        | 0.0045                        |
| LYS0462             | 11.00      | -0.0455                       | 0.0027                        | 0.0230                        | 0.0053                        |
| GLU0465             | 2.95       | -0.1673                       | -0.0385                       | 0.0817                        | 0.0064                        |
| ARG0466             | 12.49      | -0.3143                       | 0.0291                        | 0.0609                        | 0.0109                        |
| ASP0467             | 2.81       | -0.3548                       | -0.0445                       | 0.1265                        | 0.0396                        |
| GLU0471             | 3.50       | -0.0063                       | -0.0032                       | 0.0246                        | 0.0020                        |
| LYS0478             | 10.75      | 0.0994                        | -0.0091                       | 0.0164                        | 0.0053                        |
| ARG0493             | 13.62      | -0.2106                       | -0.0522                       | 0.1110                        | 0.0240                        |
| ARG0498             | 12.55      | -0.3407                       | -0.0812                       | 0.1123                        | 0.0127                        |
| HIS0505             | 6.02       | 0.1086                        | -0.0701                       | 0.0749                        | 0.0119                        |
| ARG0509             | 13.06      | -0.4417                       | 0.1141                        | 0.1452                        | 0.0320                        |
| GLU0516             | 3.50       | -0.1058                       | -0.0044                       | 0.0568                        | 0.0027                        |
| HIS0519             | 6.71       | 0.1577                        | 0.0439                        | 0.0428                        | 0.0138                        |

**Table S5.** The electrostatic polar energies and desolvation energies for the RBD residues based on the equilibrium structure of the Omicron RBD BA.2-hACE2 complex.\*

| Residue Name | pKa   | Elec.polar<br>G(charged) | Elec.<br>polar<br>G(neutral) | Desolvation<br>G(charged) | Desolvation<br>G(neutral) |
|--------------|-------|--------------------------|------------------------------|---------------------------|---------------------------|
| ASP0339      | 3.82  | -0.0993                  | 0.0421                       | 0.0832                    | 0.0277                    |
| GLU0340      | 3.05  | -0.0686                  | 0.0293                       | 0.0811                    | 0.0220                    |
| ARG0346      | 12.14 | -0.0972                  | -0.0166                      | 0.0460                    | 0.0122                    |
| ARG0355      | 13.06 | -0.1927                  | 0.0874                       | 0.1973                    | 0.0739                    |
| LYS0356      | 11.20 | 0.0111                   | -0.0106                      | 0.1754                    | 0.1047                    |
| ARG0357      | 12.25 | -0.3185                  | -0.1527                      | 0.1040                    | 0.0301                    |
| ASP0364      | 3.52  | -0.5235                  | -0.0363                      | 0.1045                    | 0.0360                    |
| LYS0378      | 10.95 | -0.2034                  | 0.0732                       | 0.0501                    | 0.0055                    |
| LYS0386      | 10.87 | 0.0003                   | -0.0047                      | 0.0097                    | 0.0051                    |
| ASP0389      | 3.91  | 0.0406                   | 0.0214                       | 0.0672                    | 0.0237                    |
| ASP0398      | 2.20  | 0.1758                   | 0.0302                       | 0.2426                    | 0.1627                    |
| ARG0403      | 12.97 | 0.1549                   | 0.0596                       | 0.0951                    | 0.0115                    |
| GLU0406      | 2.51  | -0.3939                  | -0.1179                      | 0.1513                    | 0.0139                    |
| ASP0420      | 3.14  | -0.3525                  | 0.0029                       | 0.1144                    | 0.0308                    |
| LYS0424      | 11.82 | -0.4666                  | 0.0532                       | 0.1300                    | 0.0151                    |
| ASP0427      | 3.46  | -0.1642                  | 0.0409                       | 0.0713                    | 0.0250                    |
| ASP0428      | 3.61  | -0.3245                  | -0.0656                      | 0.0823                    | 0.0297                    |
| LYS0440      | 10.83 | -0.0327                  | -0.0003                      | 0.0110                    | 0.0049                    |
| ASP0442      | 2.21  | -0.3310                  | 0.1723                       | 0.2134                    | 0.0540                    |
| LYS0444      | 10.53 | -0.0529                  | 0.0196                       | 0.0383                    | 0.0046                    |
| ARG0454      | 13.09 | -0.9663                  | -0.1073                      | 0.2756                    | 0.0419                    |
| ARG0457      | 13.22 | -0.3610                  | 0.0498                       | 0.1616                    | 0.0614                    |
| LYS0458      | 11.01 | -0.0046                  | 0.0223                       | 0.0247                    | 0.0053                    |
| LYS0462      | 10.99 | -0.0913                  | -0.0080                      | 0.0292                    | 0.0077                    |
| GLU0465      | 2.79  | -0.2246                  | -0.0936                      | 0.1136                    | 0.0122                    |
| ARG0466      | 12.50 | -0.6164                  | -0.1977                      | 0.0791                    | 0.0173                    |
| ASP0467      | 2.92  | -0.2084                  | -0.1494                      | 0.1630                    | 0.0588                    |
| GLU0471      | 3.46  | -0.0586                  | 0.0318                       | 0.0229                    | 0.0008                    |
| LYS0478      | 10.82 | 0.0146                   | 0.0120                       | 0.0075                    | 0.0058                    |
| ARG0493      | 13.04 | -0.3137                  | -0.1730                      | 0.2313                    | 0.0685                    |
| ARG0498      | 13.46 | -0.6965                  | 0.0474                       | 0.2437                    | 0.0374                    |
| HIS0505      | 5.78  | 0.0517                   | -0.0336                      | 0.1003                    | 0.0180                    |
| ARG0509      | 13.04 | -0.4000                  | 0.2088                       | 0.2133                    | 0.0454                    |
| GLU0516      | 3.26  | -0.4601                  | -0.0451                      | 0.0956                    | 0.0168                    |
| HIS0519      | 6.50  | 0.0315                   | -0.0072                      | 0.0120                    | 0.0046                    |

**Table S6.** The electrostatic polar energies and desolvation energies for the RBD residues based on the equilibrium structure of the Omicron RBD BA.3-hACE2 complex.\*

| Residue Name | pKa   | Elec.polar<br>G(charged) | Elec. polar<br>G(neutral) | Desolvation<br>G(charged) | Desolvation<br>G(neutral) |
|--------------|-------|--------------------------|---------------------------|---------------------------|---------------------------|
| ASP0339      | 3.78  | -0.1619                  | 0.0544                    | 0.0680                    | 0.0228                    |
| GLU0340      | 3.03  | -0.0815                  | 0.0242                    | 0.0640                    | 0.0342                    |
| ARG0346      | 12.15 | -0.1075                  | -0.0152                   | 0.0566                    | 0.0178                    |
| ARG0355      | 13.04 | -0.2072                  | 0.0870                    | 0.1497                    | 0.0485                    |
| LYS0356      | 11.12 | 0.0344                   | 0.0037                    | 0.0519                    | 0.0172                    |
| ARG0357      | 12.17 | -0.1901                  | -0.2289                   | 0.0486                    | 0.0103                    |
| ASP0364      | 3.91  | -0.0739                  | 0.0332                    | 0.1188                    | 0.0345                    |
| LYS0378      | 10.85 | -0.1407                  | 0.0142                    | 0.0316                    | 0.0042                    |
| LYS0386      | 10.91 | 0.0002                   | -0.0080                   | 0.0018                    | 0.0043                    |
| ASP0389      | 3.83  | 0.0469                   | 0.0261                    | 0.1047                    | 0.0339                    |
| ASP0398      | 2.50  | 0.1899                   | 0.0363                    | 0.2494                    | 0.0886                    |
| ARG0403      | 13.13 | 0.0608                   | 0.1371                    | 0.0939                    | 0.0155                    |
| GLU0406      | 2.22  | -0.5186                  | -0.1393                   | 0.1896                    | 0.1051                    |
| ARG0408      | 12.21 | -0.0873                  | -0.0165                   | 0.0176                    | 0.0039                    |
| ASP0420      | 3.32  | -0.1717                  | 0.0651                    | 0.1037                    | 0.0263                    |
| LYS0424      | 11.39 | -0.2473                  | 0.0059                    | 0.1422                    | 0.0105                    |
| ASP0427      | 3.50  | -0.1628                  | 0.0256                    | 0.0613                    | 0.0219                    |
| ASP0428      | 3.58  | -0.3356                  | -0.0390                   | 0.0924                    | 0.0302                    |
| LYS0440      | 10.85 | -0.1198                  | 0.0033                    | 0.0164                    | 0.0037                    |
| ASP0442      | 2.10  | -0.2708                  | 0.0907                    | 0.2122                    | 0.0692                    |
| LYS0444      | 10.45 | 0.0291                   | -0.0179                   | 0.0588                    | 0.0063                    |
| ARG0454      | 12.99 | -0.9878                  | -0.1701                   | 0.3992                    | 0.0710                    |
| ARG0457      | 13.20 | -0.4717                  | -0.2062                   | 0.1838                    | 0.0345                    |
| LYS0458      | 11.02 | 0.0111                   | -0.0061                   | 0.0520                    | 0.0071                    |
| LYS0462      | 11.02 | -0.0454                  | -0.0015                   | 0.0271                    | 0.0050                    |
| GLU0465      | 2.83  | -0.2698                  | -0.0884                   | 0.1026                    | 0.0095                    |
| ARG0466      | 12.52 | -0.6312                  | -0.1788                   | 0.0898                    | 0.0226                    |
| ASP0467      | 3.09  | 0.0036                   | -0.2796                   | 0.1853                    | 0.1827                    |
| GLU0471      | 3.42  | -0.0223                  | 0.0278                    | 0.0305                    | 0.0017                    |
| LYS0478      | 10.85 | -0.0366                  | 0.0047                    | 0.0026                    | 0.0057                    |
| ARG0493      | 13.00 | -0.1220                  | 0.0565                    | 0.1390                    | 0.0270                    |
| ARG0498      | 13.35 | -0.6293                  | 0.0144                    | 0.2198                    | 0.0332                    |
| HIS0505      | 5.76  | 0.0638                   | 0.0190                    | 0.0869                    | 0.0140                    |
| ARG0509      | 12.99 | -0.3698                  | 0.1129                    | 0.3041                    | 0.0622                    |
| GLU0516      | 3.50  | -0.2544                  | 0.0114                    | 0.1275                    | 0.0238                    |
| HIS0519      | 6.52  | -0.0329                  | 0.0030                    | 0.0136                    | 0.0042                    |
